# Supplementary material for: An auxiliary strategy of partial least squares regression in pharmacokinetic/pharmacodynamic studies: A case of application of guhong injection in myocardial ischemia/reperfusion rats
Source: PubMed Central journal article supplement — J Food Drug Anal. 2023 Apr 20;32(1):79–102. doi: 10.38212/2224-6614.3492 (PMC10962654; doi:10.38212/2224-6614.3492), 2023-04-20
Supplement: jfda-32-01-079-s001.pdf [file jfda-32-01-079-s001.pdf]

---

## *Research Highlights*

---

- The LC-MS/MS approach was established for the first time to simultaneously quantify eight active ingredients in GHI.
- It is the first time to confirm that GHI treats MI/R injury by regulating CK-MB, IMA, cTn I, and  $\alpha$ -HBDH.
- Eight effective components of GHI and four pharmacodynamic indicators in plasma were first quantified to fit the PK-PD model equation, investigating the dynamic process of concentration-effect-time of GHI in treating MI/R injury.
- PLSR was first used to explore the deep relationship between eight effective components and four pharmacodynamic indicators in the plasma of MI/R injury model rats after GHI administration, identifying the main pharmacodynamic components of GHI in the treatment of MI/R injury.
